# Supplementary material for: Predicting nutrient content of ray-finned fishes using phylogenetic information
Source: PubMed Central journal article supplement (PMC6156416; doi:10.1038/s41467-018-06199-w), 2018-09-25
Supplement: 41467_2018_6199_MOESM1_ESM.pdf [file 41467_2018_6199_MOESM1_ESM.pdf]

## Supplementary Tables

Supplementary Table 1. List of included species and sources and rich sources of key nutrients. See below for units and thresholds for “source” and “rich source” as designated by FAO.<sup>1</sup> Values above the source threshold are highlighted in blue, values above the rich source threshold are highlighted in dark blue.

| Nutrient    | Source threshold (/100g) | Rich source threshold (/100g) |
|-------------|--------------------------|-------------------------------|
| Protein     | 7.65 g                   | 15.3 g                        |
| Iron        | 1.95 mg                  | 3.9 mg                        |
| Zinc        | 1.425 mg                 | 2.85 mg                       |
| Vitamin A   | 120 mcg                  | 240 mcg                       |
| Vitamin B12 | 0.75 mcg                 | 1.5 mcg                       |
| Vitamin D   | 0.36 mcg                 | 0.72 mcg                      |

| Summary                 | Protein | Iron  | Zinc  | Vitamin A | Vitamin B12 | Vitamin D |
|-------------------------|---------|-------|-------|-----------|-------------|-----------|
| Valid species, n        | 372     | 345   | 178   | 143       | 122         | 122       |
| # Source                | 17      | 33    | 15    | 7         | 15          | 4         |
| # Rich Source           | 348     | 11    | 10    | 7         | 99          | 115       |
| # Source or Rich Source | 365     | 44    | 25    | 14        | 114         | 119       |
| % Source                | 4.57    | 9.57  | 8.43  | 4.90      | 12.30       | 3.28      |
| % Rich Source           | 93.55   | 3.19  | 5.62  | 4.90      | 81.15       | 94.26     |
| % Source or Rich Source | 98.12   | 12.75 | 14.04 | 9.79      | 93.44       | 97.54     |

| Species                         | Common name              | Order           | Family          | Protein | Iron | Zinc | Vit A | Vit B12 | Vit D |
|---------------------------------|--------------------------|-----------------|-----------------|---------|------|------|-------|---------|-------|
| <i>Acanthistius brasilianus</i> | Argentine Seabass        | Perciformes     | Serranidae      | 17.90   |      |      |       |         |       |
| <i>Acanthogobius flavimanus</i> | Goby                     | Gobioidei       | Gobiidae        | 18.90   | 2.10 | 0.60 | 7     | 2.70    | 3.00  |
| <i>Acanthogobius hasta</i>      | Javelin goby             | Gobioidei       | Gobiidae        | 16.40   | 0.90 |      |       |         |       |
| <i>Acanthopagrus schlegelii</i> | Black sea bream          | Perciformes     | Sparidae        | 19.60   | 0.75 | 0.80 | 12    | 3.70    | 4.00  |
| <i>Acheilognathus rhombeus</i>  | Flat bitterling          | Cypriniformes   | Cyprinidae      | 17.50   | 1.20 |      |       |         |       |
| <i>Ailia coila</i>              | Gangetic Ailia           | Siluriformes    | Schilbeidae     | 15.30   | 0.90 |      |       |         |       |
| <i>Alcichthys alcornis</i>      | Elkhorn sculpin          | Scorpaeniformes | Cotidae         | 17.10   | 0.80 |      |       |         |       |
| <i>Allothunnus fallai</i>       | Slender Tuna             | Perciformes     | Scombridae      | 19.80   | 1.30 | 1.10 | 227   | 0.70    |       |
| <i>Amblypharyngodon mola</i>    | Mola Carplet             | Cypriniformes   | Cyprinidae      | 17.10   | 3.80 | 3.19 | 2680  |         |       |
| <i>Ammodytes personatus</i>     | Sandlance                | Perciformes     | Ammodytidae     | 16.60   | 7.90 | 3.90 | 200   | 11.00   | 21.00 |
| <i>Anabas testudineus</i>       | Climbing Perch           | Perciformes     | Abantidae       | 17.50   | 1.20 | 1.13 | 215   |         |       |
| <i>Anchoa compressa</i>         | Deep-bodied anchovy      | Clupeiformes    | Engraulidae     | 16.90   | 1.40 |      |       |         |       |
| <i>Anguilla japonica</i>        | Eel                      | Anguilliformes  | Anguillidae     | 15.75   | 1.05 | 1.40 | 2400  | 3.50    | 18.00 |
| <i>Anoplopoma fimbria</i>       | Sablefish                | Scorpaeniformes | Anoplopomatidae | 13.35   | 1.25 | 0.30 | 1500  | 2.80    | 3.50  |
| <i>Arctoscopus japonicus</i>    | Saifin Sandfish/Sandfish | Perciformes     | Trichodontidae  | 14.10   | 0.50 | 0.60 | 20    | 1.70    | 2.00  |
| <i>Argyrops bleekeri</i>        | Taiwan tai               | Perciformes     | Sparidae        | 17.80   | 9.10 |      |       |         |       |
| <i>Auxis rochei</i>             | Frigate mackerel         | Perciformes     | Scombridae      | 24.10   | 1.70 |      |       |         |       |
| <i>Auxis thazard</i>            | Bullet mackerel          | Perciformes     | Scombridae      | 23.40   | 1.90 |      |       |         |       |
| <i>Bagrus bajad</i>             | Bayad                    | Siluriformes    | Bagridae        | 27.50   | 1.10 | 0.73 | 9     | 2.80    | 0.80  |
| <i>Banjós banjos</i>            | Banjo fish               | Perciformes     | Banjosidae      | 20.80   | 1.40 |      |       |         |       |

| Species                            | Common name                  | Order             | Family           | Protein | Iron | Zinc | Vit A | Vit B12 | Vit D |
|------------------------------------|------------------------------|-------------------|------------------|---------|------|------|-------|---------|-------|
| <i>Barbonymus gonionotus</i>       | Silver Barb                  | Cypriniformes     | Cyprinidae       | 6.25    |      |      |       | 2.00    |       |
| <i>Belone belone</i>               | Needle fish Gar fish Pacific | Beloniformes      | Belonidae        | 19.80   | 0.50 |      |       |         |       |
| <i>Bero elegans</i>                | Elegant sculpin              | Scorpaeniformes   | Cottidae         | 19.50   | 0.90 |      |       |         |       |
| <i>Beryx decadactylus</i>          | Broad alfonso                | Beryciformes      | Berycidae        | 18.50   | 2.00 |      |       |         |       |
| <i>Beryx splendens</i>             | Splended Alfonso             | Beryciformes      | Berycidae        | 17.80   | 0.30 | 0.30 | 63    | 1.10    | 2.00  |
| <i>Bodianus bilunulatus</i>        | Crescent-banded wrasse       | Perciformes       | Labridae         | 20.30   | 1.50 |      |       |         |       |
| <i>Boreogadus saida</i>            | Polar Cod                    | Gadiformes        | Gadidae          |         | 0.25 | 0.37 | 24    |         |       |
| <i>Brama japonica</i>              | Pacific pomfret              | Perciformes       | Bramidae         | 18.90   | 0.40 |      |       |         |       |
| <i>Branchiostegus japonicus</i>    | Blanquillo                   | Perciformes       | Branchiostegidae | 18.45   | 0.45 | 0.30 | 27    | 2.10    | 1.00  |
| <i>Caesio xanthonota</i>           | Yellowback Fusilier          | Perciformes       | Caesionidae      | 21.10   | 0.40 | 0.40 | 19    | 0.41    |       |
| <i>Callanthis japonicus</i>        | Yellowtail red bass          | Perciformes       | Callanthiidae    | 17.30   | 0.70 |      |       |         |       |
| <i>Callionymus lunatus</i>         | Moon dragonet                | Perciformes       | Callionymidae    | 18.50   | 0.80 |      |       |         |       |
| <i>Calliurichthys japonicus</i>    | Dragonet                     | Perciformes       | Callionymidae    | 16.50   | 1.30 |      |       |         |       |
| <i>Carangoides equula</i>          | Whitefin trevally            | Perciformes       | Carangidae       | 19.60   | 1.00 |      |       |         |       |
| <i>Caranx sexfasciatus</i>         | Six-bed jack                 | Perciformes       | Carangidae       | 24.00   | 1.70 |      |       |         |       |
| <i>Carassius auratus</i>           | Crucian carp                 | Cypriniformes     | Cyprinidae       | 18.15   | 1.95 | 1.90 | 12    | 5.50    | 4.00  |
| <i>Catla catla</i>                 | Catla                        | Cypriniformes     | Cyprinidae       | 19.90   | 0.60 | 0.48 | 3     |         | 0.00  |
| <i>Cephalopholis miniata</i>       | Coral Hind                   | Perciformes       | Serranidae       | 18.40   | 0.40 | 0.40 | 0     | 1.00    |       |
| <i>Channa punctata</i>             | Spotted Snakehead            | Perciformes       | Channidae        | 17.30   | 1.50 | 1.08 | 191   |         |       |
| <i>Channa striata</i>              | Striped Snakehead            | Perciformes       | Channidae        | 17.70   | 1.00 | 0.31 |       |         |       |
| <i>Chanodichthys dabryi</i>        | Humpback                     | Cypriniformes     | Cyprinidae       | 18.70   | 1.10 |      |       |         |       |
| <i>Cheilodactylus quadricornis</i> | Black-barred morwong         | Perciformes       | Cheilodactylidae | 19.20   | 1.30 |      |       |         |       |
| <i>Cheilodactylus zonatus</i>      | Spottedtail morwong          | Scorpaeniformes   | Scorpaenidae     | 19.80   | 1.30 |      |       |         |       |
| <i>Cheilopogon agoo</i>            | Japanese flying fish         | Beloniformes      | Exocoetidae      | 22.20   | 0.90 |      |       |         |       |
| <i>Chelidonichthys spinosus</i>    | Bluefin searobin             | Scorpaeniformes   | Triglidae        | 19.75   | 0.50 | 0.50 | 9     | 2.20    | 3.00  |
| <i>Chelidoperca hirundinacea</i>   | Princess porgy               | Perciformes       | Serranidae       | 20.10   | 1.50 |      |       |         |       |
| <i>Chelon parsia</i>               | Goldspot Mullet              | Mugiliformes      | Mugilidae        | 18.70   | 2.10 | 1.43 |       |         |       |
| <i>Chirolophis japonicus</i>       | Fringed blenny               | Perciformes       | Stichaeidae      | 17.20   | 0.60 |      |       |         |       |
| <i>Chitala chitala</i>             | Clown Knifefish              | Osteoglossiformes | Notopteridae     | 17.80   | 1.60 | 0.61 | 30    |         |       |
| <i>Choerodon azurio</i>            | Azurio tuskfish              | Perciformes       | Labridae         | 20.30   | 0.70 |      |       |         |       |
| <i>Chromis notata</i>              | Pearl-spot chromis           | Perciformes       | Pomacentridae    | 19.50   | 0.70 |      |       |         |       |
| <i>Cirrhinus cirrhosus</i>         | Mrigal Carp                  | Cypriniformes     | Cyprinidae       | 18.60   | 1.80 | 0.29 | 11    |         |       |
| <i>Clarias anguillaris</i>         | Mudfish                      | Siluriformes      | Clariidae        | 25.80   | 1.40 | 0.80 | 16    | 2.60    | 1.30  |
| <i>Clarias batrachus</i>           | Philippine Catfish           | Siluriformes      | Clariidae        | 10.93   | 0.80 | 0.53 | 15    |         |       |
| <i>Cleisthenes pinetorum</i>       | Pointhead flounder           | Pleuronectiformes | Pleuronectidae   | 18.10   | 4.00 |      |       |         |       |
| <i>Clidoderma asperrimum</i>       | Roughscale sole              | Pleuronectiformes | Pleuronectidae   | 17.40   | 0.60 |      |       |         |       |
| <i>Clupea harengus</i>             | Atlantic Herring             | Clupeiformes      | Clupeidae        | 17.96   | 1.10 | 0.99 |       |         | 9.50  |
| <i>Clupea pallasii</i>             | Pacific herring              | Clupeiformes      | Clupeidae        | 16.85   | 0.90 | 1.10 | 18    | 17.40   | 22.00 |
| <i>Cobitis sinensis</i>            | Siberian spiny loach         | Salmoniformes     | Salmonidae       | 17.50   | 2.70 |      |       |         |       |

| Species                                | Common name                               | Order             | Family           | Protein | Iron | Zinc | Vit A | Vit B12 | Vit D |
|----------------------------------------|-------------------------------------------|-------------------|------------------|---------|------|------|-------|---------|-------|
| <i>Coilia dussumieri</i>               | Goldspotted Gredier Anchovy               | Clupeiformes      | Engraulidae      | 13.20   | 4.50 | 1.25 |       |         |       |
| <i>Coilia nasus</i>                    | Japanese gredier anchovy                  | Clupeiformes      | Engraulidae      | 15.90   | 1.10 |      |       |         |       |
| <i>Collichthys niveatus</i>            | Collichthys niveatus                      | Perciformes       | Sciaenidae       | 17.00   | 1.30 |      |       |         |       |
| <i>Cololabis saira</i>                 | Pacific saury                             | Beloniformes      | Scomberesocidae  | 20.15   | 1.50 | 0.80 | 16    | 15.40   | 14.90 |
| <i>Conger myriaster</i>                | Conger eel                                | Anguilliformes    | Congridae        | 17.35   | 0.65 | 0.70 | 500   | 2.30    | 0.40  |
| <i>Conger orbignianus</i>              | Argentine Conger                          | Anguilliformes    | Congridae        | 17.20   |      |      |       |         |       |
| <i>Coregonus autumnalis</i>            | Arctic Cisco                              | Salmoniformes     | Coregonidae      | 16.70   | 0.82 | 0.63 |       |         |       |
| <i>Coregonus clupeaformis</i>          | Lake Whitefish                            | Salmoniformes     | Coregonidae      | 16.88   | 0.31 | 0.51 | 11    |         | 4.40  |
| <i>Coreoperca kawamebari</i>           | Spotear brook perch                       | Perciformes       | Percichthyidae   | 19.50   | 1.10 |      |       |         |       |
| <i>Coryphaena hippurus</i>             | Dolphinfish                               | Perciformes       | Coryphaenidae    | 17.30   | 0.70 | 0.50 | 8     | 2.60    | 5.00  |
| <i>Cottus poecilopterus</i>            | Alpine bullhead                           | Scorpaeniformes   | Cottidae         | 15.00   | 2.80 |      |       |         |       |
| <i>Cottus pollux</i>                   | Japanese Sculpin/Japanese Fluvial Sculpin | Scorpaeniformes   | Cottidae         | 15.00   | 2.80 | 1.70 | 180   | 28.20   | 3.00  |
| <i>Crossocheilus latius</i>            | Stone Roller                              | Cypriniformes     | Cyprinidae       | 15.30   | 2.20 | 1.09 |       |         |       |
| <i>Ctenopharyngodon idella</i>         | Grass carp                                | Cypriniformes     | Cyprinidae       | 17.10   | 1.70 |      |       |         |       |
| <i>Cynoglossus joyneri</i>             | Red tonguesole                            | Pleuronectiformes | Cynoglossidae    | 18.60   | 1.00 |      |       |         |       |
| <i>Cynoglossus semilaevis</i>          | Tongue sole                               | Pleuronectiformes | Cynoglossidae    | 19.20   | 0.30 |      |       |         |       |
| <i>Cynoscion striatus</i>              | Striped Weakfish                          | Perciformes       | Sciaenidae       | 17.80   | 2.20 |      |       |         |       |
| <i>Cyprinus carpio</i>                 | Common carp                               | Cypriniformes     | Cyprinidae       | 17.97   | 0.93 | 0.97 | 3     | 10.00   | 10.30 |
| <i>Cyprinus carpio nudus</i>           | Israeli carp                              | Cypriniformes     | Cyprinidae       | 16.80   | 1.20 |      |       |         |       |
| <i>Dactyloptena peterseni</i>          | Starry flying gurd                        | Scorpaeniformes   | Dactylopteridae  | 19.20   | 1.20 |      |       |         |       |
| <i>Decapterus maruadsi</i>             | White-tipped mackerel scad                | Perciformes       | Cheilodactylidae | 18.45   | 1.45 | 1.30 | 11    | 9.90    | 18.70 |
| <i>Decapterus muroadsi</i>             | Brownstriped Mackerel Scad                | Perciformes       | Carangidae       | 23.60   | 1.60 | 1.00 | 4     | 12.80   | 6.00  |
| <i>Dentex tumifrons</i>                | Yellow Sea Bream                          | Lophiiformes      | Lophiidae        | 19.40   | 0.35 | 0.40 | 50    | 3.20    | 4.00  |
| <i>Dexistes rikuzenius</i>             | Rikazen flounder                          | Pleuronectiformes | Pleuronectidae   | 19.40   | 0.60 |      |       |         |       |
| <i>Diagramma pictum</i>                | Painted Sweetlips                         | Perciformes       | Haemulidae       | 19.80   | 0.40 | 0.60 | 29    | 2.11    |       |
| <i>Dictyosoma burgeri</i>              | Ribbed gunnel                             | Perciformes       | Stichaeidae      | 22.00   | 1.20 |      |       |         |       |
| <i>Dissostichus eleginoides</i>        | Patagonian Toothfish                      | Perciformes       | Nototheniidae    | 13.30   | 0.10 | 0.30 | 1800  | 0.60    | 17.00 |
| <i>Ditrema temminckii temminckii</i>   | Surffish                                  | Perciformes       | Embiotocidae     | 18.90   | 1.00 |      |       |         |       |
| <i>Doederleinia berycoides</i>         | Blackthroat seaperch                      | Perciformes       | Acropomatidae    | 22.30   | 0.30 |      |       |         |       |
| <i>Eleginus gracilis</i>               | Saffron cod                               | Gadiformes        | Gadidae          | 12.60   | 4.00 |      |       |         |       |
| <i>Engraulis anchoita hubbs larini</i> | Argentine Anchovy                         | Clupeiformes      | Engraulidae      | 19.20   |      |      |       |         |       |
| <i>Engraulis encrasicolus</i>          | European Anchovy                          | Clupeiformes      | Engraulidae      | 22.80   | 0.90 | 1.90 | 1     | 2.10    | 3.50  |
| <i>Engraulis japonicus</i>             | Anchovy                                   | Clupeiformes      | Engraulidae      | 17.95   | 2.25 | 1.00 | 11    | 13.90   | 4.00  |
| <i>Engraulis ringens</i>               | Anchoveta                                 | Clupeiformes      | Engraulidae      | 21.00   | 1.40 |      |       |         |       |
| <i>Epinephelus aeneus</i>              | White Grouper                             | Perciformes       | Serranidae       | 33.80   | 1.40 | 0.65 | 30    | 6.60    | 7.50  |
| <i>Epinephelus akaara</i>              | Red-spotted grouper                       | Perciformes       | Serranidae       | 21.00   | 1.30 |      |       |         |       |
| <i>Epinephelus awoara</i>              | Yellow grouper                            | Perciformes       | Serranidae       | 19.40   | 0.90 |      |       |         |       |

| Species                             | Common name                  | Order             | Family           | Protein | Iron | Zinc | Vit A | Vit B12 | Vit D |
|-------------------------------------|------------------------------|-------------------|------------------|---------|------|------|-------|---------|-------|
| <i>Epinephelus epistictus</i>       | Dotted grouper               | Perciformes       | Serranidae       | 19.30   | 1.00 |      |       |         |       |
| <i>Esox lucius</i>                  | Northern Pike                | Esociformes       | Esocidae         | 17.83   | 0.18 | 0.70 |       |         |       |
| <i>Ethmalosa fimbriata</i>          | Bonga Shad                   | Clupeiformes      | Clupeidae        | 19.10   | 1.70 | 1.60 |       |         |       |
| <i>Etrumeus teres</i>               | Bigeye sardine               | Clupeiformes      | Clupeidae        | 19.90   | 1.90 | 1.30 | 130   | 14.20   | 9.00  |
| <i>Eumicrotremus orbis</i>          | Pacific spiny lumpsucker     | Scorpaeniformes   | Cyclopteridae    | 7.20    | 1.20 |      |       |         |       |
| <i>Euthymus affinis</i>             | Kawakawa                     | Perciformes       | Scombridae       | 25.00   | 1.30 | 0.27 | 31    |         | 3.12  |
| <i>Eutropiichthys vacha</i>         | Batchwa Vacha                | Siluriformes      | Schilbeidae      | 16.10   | 0.70 |      |       |         |       |
| <i>Evisτίας acutirostris</i>        | Striped boarfish             | Perciformes       | Pentacerotidae   | 18.60   | 1.20 |      |       |         |       |
| <i>Gadus macrocephalus</i>          | Pacific cod                  | Gadiformes        | Gadidae          | 18.55   | 0.30 | 0.50 | 10    | 1.30    | 1.00  |
| <i>Gadus morhua</i>                 | Atlantic cod                 | Gadiformes        | Gadidae          | 17.76   | 0.25 | 0.40 | 12    | 0.91    | 2.76  |
| <i>Genypterus blacodes</i>          | Pink Cusk-Eel                | Ophidiiformes     | Ophidiidae       | 15.80   |      |      |       |         |       |
| <i>Genypterus capensis</i>          | Kingclip                     | Ophidiiformes     | Ophidiidae       | 18.20   | 0.30 | 0.50 | 5     | 1.30    | 0.00  |
| <i>Girella punctata</i>             | Girella                      | Perciformes       | Kyphosidae       | 19.80   | 0.70 | 0.90 | 55    | 1.80    | 1.00  |
| <i>Glossanodon semifasciatus</i>    | Deep-sea smelt               | Salmoniformes     | Argentinidae     | 18.70   | 0.40 | 0.40 | 75    | 3.40    | 0.00  |
| <i>Glossogobius giuris</i>          | Tank Goby                    | Perciformes       | Gobiidae         | 14.70   | 1.20 | 0.93 |       |         |       |
| <i>Glyptocephalus stelleri</i>      | Blackfin flounder            | Pleuronectiformes | Pleuronectidae   | 18.20   | 0.60 |      |       |         |       |
| <i>Gnathopogon caeruleus</i>        | Willow Shiner                | Cypriniformes     | Cyprinidae       | 17.50   | 1.30 | 3.40 | 250   | 9.00    | 5.00  |
| <i>Gudusia chapra</i>               | Indian River Shad            | Clupeiformes      | Clupeidae        | 15.40   | 4.80 | 1.97 | 6     |         |       |
| <i>Gymnocanthus herzensteini</i>    | Black edged sculpin          | Scorpaeniformes   | Cottidae         | 19.50   | 2.50 |      |       |         |       |
| <i>Halichoeres tenuispinis</i>      | Motley stripe rainbowfish    | Perciformes       | Labridae         | 19.20   | 1.10 |      |       |         |       |
| <i>Halieutaea stellata</i>          | Minipizza bat fish           | Lophiiformes      | Ogcocephalidae   | 15.80   | 1.00 |      |       |         |       |
| <i>Haplogenyus mucronatus</i>       | Broadbanded velvetchin       | Perciformes       | Haemulidae       | 18.50   | 1.10 |      |       |         |       |
| <i>Haplogenyus nigripinnis</i>      | Short barbeled velvetchin    | Perciformes       | Haemulidae       | 19.00   | 1.30 |      |       |         |       |
| <i>Helicolenus dactylopterus</i>    | Blackbelly Rosefish          | Scorpaeniformes   | Scorpaenidae     | 17.10   |      |      |       |         |       |
| <i>Helicolenus hilgendorffii</i>    | Hilgendorf saucord; Rosefish | Scorpaeniformes   | Scorpaenidae     | 16.70   | 0.70 |      |       |         |       |
| <i>Hemibarbus labeo</i>             | Barbel steed                 | Cypriniformes     | Cyprinidae       | 17.30   | 1.00 |      |       |         |       |
| <i>Hemibarbus longirostris</i>      | Long-nose barbel             | Cypriniformes     | Cyprinidae       | 17.70   | 1.40 |      |       |         |       |
| <i>Hemitripterus villosus</i>       | Shaggy sea raven             | Scorpaeniformes   | Hemitripterae    | 18.60   | 0.50 |      |       |         |       |
| <i>Henicorhynchus siamensis</i>     | Siamese Mud Carp             | Cypriniformes     | Cyprinidae       | 6.25    |      |      |       | 1.60    |       |
| <i>Heteropneustes fossilis</i>      | Stinging Catfish             | Siluriformes      | Heteropneustidae | 17.20   | 2.10 | 0.55 | 16    |         |       |
| <i>Heteropriacanthus cruentatus</i> | Glasseye                     | Perciformes       | Priacanthidae    | 18.00   | 1.10 |      |       |         |       |
| <i>Hexagrammos agrammus</i>         | Spotty belly greenling       | Scorpaeniformes   | Hexagrammidae    | 17.50   | 2.90 |      |       |         |       |
| <i>Hexagrammos octogrammus</i>      | Masked greenling             | Scorpaeniformes   | Hexagrammidae    | 17.50   | 1.80 |      |       |         |       |
| <i>Hexagrammos otakii</i>           | Fat greenling                | Scorpaeniformes   | Hexagrammidae    | 20.05   | 0.35 | 0.50 | 6     | 2.20    | 9.00  |
| <i>Hime japonica</i>                | Hime japonica                | Aulopiformes      | Aulopidae        | 20.90   | 1.00 |      |       |         |       |
| <i>Hippoglossus stenolepis</i>      | Pacific Halibut              | Pleuronectiformes | Pleuronectidae   | 19.90   | 0.10 | 0.50 | 13    | 2.10    | 3.00  |
| <i>Histiogaster typus</i>           | Sailfin armourhead           | Perciformes       | Pentacerotidae   | 19.30   | 1.20 |      |       |         |       |
| <i>Hoplias malabaricus</i>          | Trahira                      | Characiformes     | Erythrinidae     | 18.10   |      |      |       |         |       |

| Species                              | Common name               | Order             | Family           | Protein | Iron | Zinc | Vit A | Vit B12 | Vit D |
|--------------------------------------|---------------------------|-------------------|------------------|---------|------|------|-------|---------|-------|
| <i>Hoplobrotula armata</i>           | Armored weasel-fish       | Ophidiiformes     | Ophidiidae       | 18.20   | 1.00 |      |       |         |       |
| <i>Hypomesus japonicus</i>           | Japanese Surf Smelt       | Osmeriformes      | Osmeridae        | 19.50   | 0.30 | 1.30 | 4     | 5.40    | 1.00  |
| <i>Hypomesus nipponensis</i>         | Japanese Smelt/Pond Smelt | Osmeriformes      | Osmeridae        | 14.40   | 0.90 | 2.00 | 99    | 7.90    | 2.00  |
| <i>Hypomesus olidus</i>              | Pond smelt                | Salmoniformes     | Osmeridae        | 18.40   | 0.90 |      |       |         |       |
| <i>Hypophthalmichthys molitrix</i>   | Silver big-head carp      | Cypriniformes     | Cyprinidae       | 18.25   | 1.35 | 0.28 |       |         |       |
| <i>Hypophthalmichthys nobilis</i>    | Big-head carp             | Cypriniformes     | Cyprinidae       | 17.50   | 1.20 |      |       |         |       |
| <i>Hypoptychus dybowskii</i>         | Korean sandlance          | Gasterosteiformes | Hypoptychidae    | 21.50   | 1.70 |      |       |         |       |
| <i>Hyporhamphus sajori</i>           | Half beak                 | Beloniformes      | Hemiramphidae    | 18.70   | 1.90 | 1.90 |       | 5.50    | 3.00  |
| <i>Hyporthodus septemfasciatus</i>   | Convict grouper           | Perciformes       | Serranidae       | 18.80   | 1.00 |      |       |         |       |
| <i>Ilisha elongata</i>               | Elongate ilisha           | Clupeiformes      | Pristigasteridae | 20.10   | 0.80 |      |       |         |       |
| <i>Inimicus japonicus</i>            | Devil stingfish           | Scorpaeniformes   | Synceiidae       | 19.05   | 0.50 | 0.70 | 2     | 0.60    | 1.00  |
| <i>Johnius grypotus</i>              | Corvi                     | Perciformes       | Sciaenidae       | 15.20   | 2.60 |      |       |         |       |
| <i>Kajikia audax</i>                 | Barred marlin             | Perciformes       | Istiophoridae    | 23.10   | 0.60 | 0.60 | 8     | 4.30    | 12.00 |
| <i>Kareius bicoloratus</i>           | Stone flounder            | Pleuronectiformes | Pleuronectidae   | 20.00   | 0.20 |      |       |         |       |
| <i>Katsuwonus pelamis</i>            | Skipjack tuna             | Perciformes       | Scombridae       | 25.45   | 1.85 | 0.90 | 20    | 8.60    | 9.00  |
| <i>Konosirus punctatus</i>           | Gizzard shad              | Clupeiformes      | Clupeidae        | 19.10   | 1.25 | 0.70 |       | 10.20   | 9.00  |
| <i>Labeo bata</i>                    | Bata                      | Cypriniformes     | Cyprinidae       | 15.90   | 1.20 | 0.94 |       |         |       |
| <i>Labeo calbasu</i>                 | Orangefin Labeo           | Cypriniformes     | Cyprinidae       | 17.00   | 1.10 | 0.36 |       |         |       |
| <i>Labeo gonius</i>                  | Kuria Labeo               | Cypriniformes     | Cyprinidae       | 17.60   | 0.30 | 0.06 |       |         |       |
| <i>Labeo rohita</i>                  | Roho Labeo                | Cypriniformes     | Cyprinidae       | 20.60   | 0.40 | 1.13 | 4     |         |       |
| <i>Labracoglossa argenteiventris</i> | Yellowstriped butterfish  | Perciformes       | Kyphosidae       | 18.70   | 0.60 | 1.30 | 16    | 2.00    | 4.00  |
| <i>Lagocephalus lunaris</i>          | Lurtail puffer            | Tetraodontiformes | Tetraodontidae   | 17.30   | 1.00 |      |       |         |       |
| <i>Larimichthys crocea</i>           | Large yellow croaker      | Perciformes       | Sciaenidae       | 17.20   | 1.20 |      |       |         |       |
| <i>Larimichthys polyactis</i>        | Yellow croaker            | Perciformes       | Sciaenidae       | 15.80   | 0.50 |      |       |         |       |
| <i>Lateolabrax japonicus</i>         | Common sea bass           | Perciformes       | Percichthyidae   | 18.83   | 0.80 | 0.50 | 180   | 2.00    | 10.00 |
| <i>Lates calcarifer</i>              | Barramundi                | Perciformes       | Centropomidae    | 18.60   | 1.00 | 0.16 | 8     |         | 1.50  |
| <i>Lepidopsetta mochigarei</i>       | Dusky sole                | Pleuronectiformes | Pleuronectidae   | 16.80   | 1.20 |      |       |         |       |
| <i>Lepidotrigla alata</i>            | Fork-snout searobin       | Scorpaeniformes   | Triglidae        | 16.90   | 1.00 |      |       |         |       |
| <i>Lepidotrigla microptera</i>       | Red-wing searobin         | Scorpaeniformes   | Triglidae        | 19.70   | 0.40 |      |       |         |       |
| <i>Lepomis macrochirus</i>           | Bluegill                  | Perciformes       | Centrarchidae    | 17.80   | 1.40 |      |       |         |       |
| <i>Leptomelanosoma indicum</i>       | Indian Threadfin          | Perciformes       | Poly nemidae     | 20.30   | 0.50 | 1.35 |       |         |       |
| <i>Lethrinus haematopterus</i>       | Chinese emperor           | Perciformes       | Lethrinidae      | 20.40   | 1.00 |      |       |         |       |
| <i>Lethrinus nebulosus</i>           | Spangled Emperor          | Perciformes       | Lethrinidae      | 20.50   | 0.30 | 0.50 | 8     | 3.70    | 11.00 |
| <i>Limanda aspera</i>                | Yellowfin sole            | Pleuronectiformes | Pleuronectidae   | 16.80   | 1.20 |      |       |         |       |
| <i>Liparis tanakai</i>               | Taka's silfish            | Scorpaeniformes   | Liparidae        | 16.40   | 0.50 |      |       |         |       |
| <i>Liparis tessellatus</i>           | Cubed silfish             | Scorpaeniformes   | Liparidae        | 16.40   | 1.00 |      |       |         |       |
| <i>Lobotes surinamensis</i>          | Tripletail                | Perciformes       | Lobotidae        | 21.00   | 1.10 |      |       |         |       |
| <i>Lophiomus setigerus</i>           | Angler                    | Lophiiformes      | Lophiidae        | 14.10   | 2.50 |      |       |         |       |

| Species                           | Common name                                           | Order             | Family           | Protein | Iron | Zinc | Vit A | Vit B12 | Vit D |
|-----------------------------------|-------------------------------------------------------|-------------------|------------------|---------|------|------|-------|---------|-------|
| <i>Lophius litulon</i>            | Yellow<br>goosefish                                   | Perciformes       | Sciaenidae       | 14.65   | 0.25 | 0.60 | 13    | 1.20    | 1.00  |
| <i>Lota lota</i>                  | Burbot                                                | Gadiformes        | Lotidae          | 17.83   | 0.35 | 0.65 | 3     |         |       |
| <i>Luciopimelodus pati</i>        | Pati                                                  | Siluriformes      | Pimelodidae      | 18.20   | 1.90 |      |       |         |       |
| <i>Lumpenus sagitta</i>           | Skē prickleback                                       | Perciformes       | Sichaeidae       | 19.30   | 0.90 |      |       |         |       |
| <i>Macruronus novaezelandiae</i>  | Hoki                                                  | Gadiformes        | Merlucciidae     | 17.00   | 0.30 | 0.40 | 43    | 0.70    | 1.00  |
| <i>Makaira mazara</i>             | Pacific Blue<br>Marlin/Blue<br>Marlin/Black<br>Marlin | Perciformes       | Istiophoridae    | 22.90   | 0.50 | 0.70 | 2     | 1.50    | 38.00 |
| <i>Malakichthys wakiyae</i>       | Silver-belly sea<br>perch                             | Perciformes       | Acropomatidae    | 18.70   | 0.70 |      |       |         |       |
| <i>Mallotus villosus</i>          | Capelin                                               | Salmoniformes     | Osmeridae        |         |      |      |       |         |       |
| <i>Mastocembellus armatus</i>     | Zig-Zag Eel                                           | Synbranchiformes  | Mastacembelidae  | 16.10   | 0.80 | 1.30 | 829   | 2.40    |       |
| <i>Merluccius merluccius</i>      | European Hake                                         | Gadiformes        | Merlucciidae     | 17.10   | 1.90 |      |       |         |       |
| <i>Microcanthus strigatus</i>     | Stripey                                               | Perciformes       | Kyphosidae       | 19.50   | 0.90 |      |       |         |       |
| <i>Micromesistius australis</i>   | Southern Blue<br>Whiting                              | Gadiformes        | Gadidae          | 16.40   | 0.30 | 0.30 | 6     | 1.60    | 7.00  |
| <i>Micromesistius poutassou</i>   | Blue Whiting                                          | Gadiformes        | Gadidae          | 17.50   | 1.00 |      |       |         |       |
| <i>Micropogonias undulatus</i>    | Atlantic<br>Croaker                                   | Perciformes       | Sciaenidae       | 19.50   |      |      |       |         |       |
| <i>Micropterus salmoides</i>      | Largemouth<br>black bass                              | Perciformes       | Centrarchidae    | 18.20   | 4.50 |      |       |         |       |
| <i>Müchthys müuy</i>              | Mi-iuy croaker                                        | Perciformes       | Sciaenidae       | 18.00   | 0.30 |      |       |         |       |
| <i>Misgurnus anguillicaudatus</i> | Loach                                                 | Cypriniformes     | Cobitidae        | 16.15   | 6.80 | 2.90 | 15    | 8.50    | 4.00  |
| <i>Monopterus albus</i>           | Asian swamp<br>eel                                    | Synbranchiformes  | Synbranchidae    | 17.90   | 1.40 |      |       |         |       |
| <i>Mugil cephalus</i>             | Common mullet                                         | Mugiliformes      | Mugilidae        | 20.45   | 0.85 | 0.50 | 8     | 4.70    | 10.00 |
| <i>Muraenesox cinereus</i>        | Silver conger<br>eel                                  | Anguilliformes    | Muraenesocidae   | 20.10   | 1.15 | 0.60 | 59    | 1.90    | 5.00  |
| <i>Mystus cavasius</i>            | Gangetic<br>Mystus                                    | Siluriformes      | Bagridae         | 15.40   | 1.30 | 0.88 |       |         |       |
| <i>Mystus gulio</i>               | Long Whiskers<br>Catfish                              | Siluriformes      | Bagridae         | 17.00   | 0.90 | 0.23 |       |         |       |
| <i>Mystus wolffii</i>             | Mystus wolffii                                        | Siluriformes      | Bagridae         | 6.25    |      |      |       |         |       |
| <i>Nandus nandus</i>              | Gangetic<br>Leafish                                   | Perciformes       | ndidae           | 15.80   | 1.90 | 1.42 |       |         |       |
| <i>Nemadactylus bergi</i>         | Castaneda                                             | Perciformes       | Cheilodactylidae | 18.40   |      |      |       |         |       |
| <i>Nemipterus japonicus</i>       | Japanese<br>Threadfin<br>Bream                        | Perciformes       | Nemipteridae     | 18.40   | 0.80 | 0.30 | 0     | 2.00    |       |
| <i>Nemipterus virgatus</i>        | Golden<br>threadfin bream                             | Perciformes       | Nemipteridae     | 19.80   | 0.70 |      |       |         |       |
| <i>Neoditrema ransonnetii</i>     | Surfperch                                             | Perciformes       | Embiotocidae     | 21.80   | 1.80 |      |       |         |       |
| <i>Niphon spinosus</i>            | Ara                                                   | Perciformes       | Serranidae       | 19.30   | 1.40 |      |       |         |       |
| <i>Notopterus notopterus</i>      | Bronze<br>Featherback                                 | Osteoglossiformes | Notopteridae     | 17.80   | 1.00 | 0.74 | 30    |         |       |
| <i>Odontesthes incisa</i>         | Silverside                                            | Atheriniformes    | Atherinidae      | 16.00   | 2.00 |      |       |         |       |
| <i>Odontesthes bonariensis</i>    | Argentinian<br>Silverside                             | Atheriniformes    | Atherinopsidae   | 18.30   | 1.90 |      |       |         |       |
| <i>Odontesthes regia</i>          | Chilean<br>Silverside                                 | Atheriniformes    | Atherinopsidae   | 18.60   |      |      |       |         |       |
| <i>Odontobutis platycephala</i>   | Fresh-water<br>goby                                   | Gobioidei         | Odontobutidae    | 16.90   | 1.00 |      |       |         |       |
| <i>Ompok pabda</i>                | Pabdah Catfish                                        | Siluriformes      | Siluridae        | 17.30   | 1.20 | 1.25 |       |         |       |
| <i>Oncorhynchus gorbuscha</i>     | Pink Salmon                                           | Salmoniformes     | Salmonidae       | 21.70   | 0.40 | 0.60 | 13    | 4.60    | 22.00 |
| <i>Oncorhynchus keta</i>          | Chum salmon                                           | Salmoniformes     | Salmonidae       | 21.45   | 0.80 | 0.50 | 11    | 5.90    | 32.00 |
| <i>Oncorhynchus kisutch</i>       | Coho salmon                                           | Salmoniformes     | Salm onidae      | 20.65   | 1.40 | 0.60 | 36    | 5.20    | 15.00 |

| Species                             | Common name                 | Order             | Family          | Protein | Iron | Zinc | Vit A | Vit B12 | Vit D |
|-------------------------------------|-----------------------------|-------------------|-----------------|---------|------|------|-------|---------|-------|
| <i>Oncorhynchus masou</i>           | Cherry salmon               | Salmoniformes     | Salmonidae      | 20.60   | 1.20 | 0.50 | 63    | 7.60    | 10.00 |
| <i>Oncorhynchus masou ishikawae</i> | Masu Salmon                 | Salmoniformes     | Salmonidae      | 18.30   | 0.40 | 0.80 | 7     | 5.50    | 9.00  |
| <i>Oncorhynchus mykiss</i>          | Rainbow trout               | Salmoniformes     | Salmonidae      | 21.10   | 1.80 |      |       |         |       |
| <i>Oncorhynchus nerka</i>           | Sockeye salmon              | Salmoniformes     | Salmonidae      | 22.50   | 0.40 | 0.50 | 27    | 9.40    | 33.00 |
| <i>Oncorhynchus tshawytscha</i>     | Chinook Salmon              | Salmoniformes     | Salmonidae      | 18.80   | 0.25 | 0.35 | 111   | 2.35    | 16.00 |
| <i>Oplegnathus fasciatus</i>        | Rock bream                  | Perciformes       | Oplegthidae     | 18.65   | 0.45 | 0.60 | 39    | 1.30    | 3.00  |
| <i>Oplegnathus punctatus</i>        | Spotted knifejaw            | Perciformes       | Oplegthidae     | 18.90   | 0.70 |      |       |         |       |
| <i>Oreochromis mossambicus</i>      | Mozambique tilapia          | Perciformes       | Cichlidae       | 20.05   | 0.80 | 1.40 | 2     |         | 5.50  |
| <i>Oreochromis niloticus</i>        | Nile Tilapia                | Perciformes       | Cichlidae       | 19.80   | 0.50 | 0.40 | 3     | 2.30    | 11.00 |
| <i>Osmerus mordax</i>               | Pacific rainbow smelt       | Salmoniformes     | Osmeridae       | 17.40   | 1.40 |      |       |         |       |
| <i>Ostichthys japonicus</i>         | Big-eye soldierfish         | Beryciformes      | Holocentridae   | 21.30   | 1.20 |      |       |         |       |
| <i>Pagrus major</i>                 | Genuine porgy               | Perciformes       | Sparidae        | 19.50   | 0.35 | 0.40 | 8     | 1.20    | 5.00  |
| <i>Pagrus pagrus</i>                | Red Porgy                   | Perciformes       | Sparidae        | 20.40   | 1.80 | 3.30 |       |         |       |
| <i>Pampus argenteus</i>             | Silver/white pomfret        | Perciformes       | Stromateidae    | 17.13   | 0.40 | 0.39 | 90    | 1.40    | 5.00  |
| <i>Pampus chinensis</i>             | Chinese Silver Pomfret      | Perciformes       | Stromateidae    | 15.90   | 0.40 | 0.59 |       |         |       |
| <i>Pangasianodon hypophthalmus</i>  | Striped Catfish             | Siluriformes      | Pangasiidae     | 6.25    |      |      |       | 4.50    |       |
| <i>Pangasius pangasius</i>          | Pangas Catfish              | Siluriformes      | Pangasiidae     | 15.90   | 0.10 | 1.85 | 5     |         |       |
| <i>Parabembras curtus</i>           | Matron flathead             | Scorpaeniformes   | Bembridgeae     | 20.10   | 1.30 |      |       |         |       |
| <i>Parajulis poecilopterus</i>      | Multicolor finfish          | Perciformes       | Labridae        | 19.30   | 2.60 |      |       |         |       |
| <i>Paralichthys olivaceus</i>       | Bastard halibut             | Pleuronectiformes | Paralichthyidae | 20.75   | 0.38 | 0.40 | 12    | 1.00    | 3.00  |
| <i>Parapercis multifasciata</i>     | Bicolor-barred weever       | Perciformes       | Pinguipedidae   | 18.30   | 0.90 |      |       |         |       |
| <i>Parapercis sexfasciata</i>       | Grub fish                   | Perciformes       | Pinguipedidae   | 20.80   | 1.30 |      |       |         |       |
| <i>Parapristipoma trilineatum</i>   | Grunt                       | Perciformes       | Haemulidae      | 17.10   | 0.80 | 0.60 | 41    | 5.80    | 15.00 |
| <i>Parascalopsis inermis</i>        | Unarmed dwarf monocle bream | Perciformes       | Nemipteridae    | 19.20   | 0.60 |      |       |         |       |
| <i>Parastromateus niger</i>         | Black Pomfret               | Perciformes       | Carangidae      | 19.60   | 0.90 | 0.48 |       |         |       |
| <i>Parona signata</i>               | Paro Leatherjacket          | Perciformes       | Carangidae      | 20.10   |      |      |       |         |       |
| <i>Pennahia argentata</i>           | White croaker               | Perciformes       | Sciaenidae      | 18.65   | 0.40 | 0.60 | 5     | 2.50    | 2.90  |
| <i>Percophis brasiliensis</i>       | Brazilian Flathead          | Perciformes       | Percophidae     | 20.10   |      |      |       |         |       |
| <i>Pholis nebulosa</i>              | Tidepool gunnel             | Perciformes       | Pholidae        | 20.70   | 1.10 |      |       |         |       |
| <i>Platycephalus indicus</i>        | Bartailed flathead          | Scorpaeniformes   | Platycephalidae | 20.00   | 0.60 |      |       |         |       |
| <i>Plecoglossus altivelis</i>       | Sweet fish                  | Salmoniformes     | Plecoglossidae  | 17.50   | 1.10 | 0.80 | 35    | 10.30   | 1.00  |
| <i>Plectorhynchus cinctus</i>       | Crescent sweetlips          | Perciformes       | Haemulidae      | 19.50   | 0.70 |      |       |         |       |
| <i>Pleurogrammus azonus</i>         | Arabesque greenling         | Scorpaeniformes   | Hexagrammidae   | 18.45   | 4.15 | 1.10 | 25    | 10.70   | 3.00  |
| <i>Pleuronectes herzensteini</i>    | Brown sole                  | Pleuronectiformes | Pleuronectidae  | 19.50   | 0.35 | 0.80 | 5     | 3.10    | 13.00 |
| <i>Pleuronectes yokohamae</i>       | Marbled sole                | Pleuronectiformes | Pleuronectidae  | 18.95   | 0.35 | 0.80 | 6     | 1.80    | 6.70  |
| <i>Pleuronichthys cornutus</i>      | Ridged-eye flounder         | Pleuronectiformes | Pleuronectidae  | 17.60   | 1.10 |      |       |         |       |
| <i>Polynemus quadrifilis</i>        | Giant African Threadfin     | Perciformes       | Poly nemidae    | 17.60   | 0.30 | 1.00 |       |         |       |
| <i>Pomatomus saltatrix</i>          | Bluefish                    | Perciformes       | Pomatomidae     | 21.50   | 1.40 |      |       |         |       |

| Species                            | Common name                           | Order             | Family         | Protein | Iron | Zinc | Vit A | Vit B12 | Vit D |
|------------------------------------|---------------------------------------|-------------------|----------------|---------|------|------|-------|---------|-------|
| <i>Priacanthus macracanthus</i>    | Red bigeye                            | Perciformes       | Priacanthidae  | 18.90   | 1.20 |      |       |         |       |
| <i>Prionotus punctatus</i>         | Bluewing Searobin                     | Scorpaeniformes   | Triglidae      | 18.90   |      |      |       |         |       |
| <i>Protonibea diacanthus</i>       | Blacksotted Croaker                   | Perciformes       | Sciaenidae     | 18.60   | 0.40 | 0.65 | 17    |         | 0.60  |
| <i>Psenopsis anomala</i>           | Butterfish                            | Perciformes       | Centrolophidae | 16.35   | 0.55 | 0.80 | 95    | 2.70    | 2.00  |
| <i>Pseudaesopia japonica</i>       | Wavy-banded sole                      | Pleuronectiformes | Soleidae       | 18.40   | 1.10 |      |       |         |       |
| <i>Pseudambassis ranga</i>         | Indian Glassy Catfish                 | Perciformes       | Ambassidae     | 15.50   | 2.00 | 2.45 | 106   |         |       |
| <i>Pseudobleennius cottoides</i>   | Sunrise sculpin                       | Scorpaeniformes   | Cottidae       | 22.40   | 1.70 |      |       |         |       |
| <i>Pseudocaranx dentex</i>         | Striped Jack/White Trevally           | Perciformes       | Carangidae     | 21.90   | 0.70 | 1.10 | 10    | 3.20    | 18.00 |
| <i>Pseudogobio esocinus</i>        | Pike gudgeon                          | Cypriniformes     | Cyprinidae     | 15.70   | 1.20 |      |       |         |       |
| <i>Pseudolabrus japonicus</i>      | Bambooleaf wrasse                     | Perciformes       | Labridae       | 18.90   | 1.10 |      |       |         |       |
| <i>Pseudoplatystoma corruscans</i> | Spotted Sorubim                       | Siluriformes      | Pimelodidae    | 18.20   | 1.90 |      |       |         |       |
| <i>Pseudorasbora parva</i>         | Stone moroko                          | Cypriniformes     | Cyprinidae     | 16.40   | 2.50 |      |       |         |       |
| <i>Pterocaesio digramma</i>        | Double-Lined Fusilier                 | Perciformes       | Caesionidae    | 20.20   | 0.50 | 0.70 | 7     | 4.40    | 2.00  |
| <i>Puntius sophore</i>             | Pool Barb                             | Cypriniformes     | Cyprinidae     | 17.60   | 2.00 | 3.00 |       |         |       |
| <i>Rastrelliger brachysoma</i>     | Short Mackerel                        | Perciformes       | Scombridae     | 6.25    |      |      |       |         |       |
| <i>Rastrelliger kanagurta</i>      | Indian mackerel                       | Perciformes       | Scombridae     | 20.51   |      |      |       |         |       |
| <i>Rexea prometheoides</i>         | Royal escolar                         | Perciformes       | Gempylidae     | 20.00   | 0.80 |      |       |         |       |
| <i>Salangichthys microdon</i>      | Icefish                               | Salmoniformes     | Salangidae     | 13.45   | 0.55 | 1.20 | 50    | 3.30    | 1.00  |
| <i>Salminus maxillosus</i>         | Dorado                                | Characiformes     | Bryconidae     | 18.80   |      |      |       |         |       |
| <i>Salmo salar</i>                 | Atlantic Salmon                       | Salmoniformes     | Salmonidae     | 20.10   | 0.30 | 0.40 | 17    | 8.90    | 10.00 |
| <i>Salmophasia bacaila</i>         | Large Razorbelly Minnow               | Cypriniformes     | Cyprinidae     | 18.10   | 5.40 | 3.10 |       |         |       |
| <i>Salmophasia phulo</i>           | Razorbelly Minnow                     | Cypriniformes     | Cyprinidae     | 15.30   | 1.90 | 3.10 |       |         |       |
| <i>Salvelinus alpinus</i>          | Arctic Char                           | Salmoniformes     | Salmonidae     | 18.75   | 0.34 | 0.42 | 32    |         | 25.80 |
| <i>Salvelinus leucomaenis</i>      | White-Spotted Char/Char/Japanese Char | Salmoniformes     | Salmonidae     | 19.00   | 0.30 | 0.80 | 5     | 4.20    | 5.00  |
| <i>Salvelinus namaycush</i>        | Lake Trout                            | Salmoniformes     | Salmonidae     | 15.78   | 0.23 | 0.62 | 40    |         | 19.70 |
| <i>Sarda orientalis</i>            | Striped bonito                        | Perciformes       | Scombridae     | 24.60   | 2.10 |      |       |         |       |
| <i>Sarda sarda</i>                 | Atlantic Bonito                       | Perciformes       | Scombridae     | 22.00   |      |      |       |         |       |
| <i>Sardina pilchardus</i>          | European pilchard                     | Clupeiformes      | Clupeidae      | 17.33   |      |      |       |         | 21.20 |
| <i>Sardinella zunasi</i>           | Japanese sardinella                   | Clupeiformes      | Clupeidae      | 16.30   | 1.90 |      |       |         |       |
| <i>Sardinops sagax</i>             | South American Pilchard               | Clupeiformes      | Clupeidae      | 18.77   | 2.00 | 1.60 | 8     | 15.70   | 32.00 |
| <i>Satyrichthys rieffeli</i>       | Spotted armored-gurrd                 | Scorpaeniformes   | Peristediidae  | 19.30   | 2.10 |      |       |         |       |
| <i>Saurida undosquamis</i>         | Lizard fish                           | Aulopiformes      | Synodontidae   | 20.80   | 0.40 |      |       |         |       |
| <i>Scomber australasicus</i>       | Blue Mackerel                         | Perciformes       | Scombridae     | 23.00   | 1.60 | 1.10 | 8     | 12.60   | 4.30  |
| <i>Scomber colias</i>              | Black Drum                            | Perciformes       | Sciaenidae     | 18.80   |      |      |       |         |       |
| <i>Scomber japonicus</i>           | Mackerel                              | Perciformes       | Scombridae     | 19.00   | 1.60 | 1.10 | 37    | 12.90   | 5.10  |
| <i>Scomber scombrus</i>            | Atlantic Mackerel                     | Perciformes       | Scombridae     | 17.20   | 0.90 | 0.90 | 44    | 8.10    | 10.00 |
| <i>Scomberomorus cavalla</i>       | King Mackerel                         | Perciformes       | Scombridae     | 20.90   | 0.50 | 0.60 | 17    | 0.55    |       |



| Species                          | Common name                               | Order           | Family         | Protein | Iron | Zinc | Vit A | Vit B12 | Vit D |
|----------------------------------|-------------------------------------------|-----------------|----------------|---------|------|------|-------|---------|-------|
| <i>Scomberomorus commerson</i>   | row-Barred Spanish Mackerel               | Perciformes     | Scombridae     | 19.80   | 2.00 | 0.40 | 30    |         |       |
| <i>Scomberomorus guttatus</i>    | Indo-Pacific King Mackerel                | Perciformes     | Scombridae     | 20.90   | 0.80 | 0.78 |       |         |       |
| <i>Scomberomorus koreanus</i>    | Korean seerfish                           | Perciformes     | Scombridae     | 17.90   | 0.70 |      |       |         |       |
| <i>Scomberomorus niphonius</i>   | Spanish mackerel                          | Perciformes     | Scombridae     | 19.73   | 0.70 | 0.80 | 12    | 4.00    | 7.00  |
| <i>Scombrops boops</i>           | Japanese blue fish                        | Perciformes     | Scombroptidae  | 18.75   | 0.65 | 0.40 | 8     | 1.90    | 4.00  |
| <i>Scorpaena neglecta</i>        | Izu scorpionfish sting fish               | Scorpaeniformes | Scorpaenidae   | 15.50   | 0.90 |      |       |         |       |
| <i>Scorpaenopsis cirrhosa</i>    | Weedy stingfish                           | Scorpaeniformes | Scorpaenidae   | 19.00   | 1.10 |      |       |         |       |
| <i>Sebastes alutus</i>           | Pacific Ocean perch, Longjaw rockfish     | Scorpaeniformes | Scorpaenidae   | 16.45   | 0.25 | 0.40 | 20    | 1.60    | 3.00  |
| <i>Sebastes hubbsi</i>           | Amorclad rockfish                         | Scorpaeniformes | Scorpaenidae   | 18.30   | 0.90 |      |       |         |       |
| <i>Sebastes inermis</i>          | Black rock fish                           | Scorpaeniformes | Scorpaenidae   | 19.30   | 0.60 |      |       |         |       |
| <i>Sebastes iracundus</i>        | Angry Rockfish                            | Scorpaeniformes | Scorpaenidae   | 16.30   | 0.20 | 0.40 | 85    | 3.30    | 3.00  |
| <i>Sebastes matsubarae</i>       | Matsubara's Red Rockfish                  | Scorpaeniformes | Scorpaenidae   | 16.80   | 0.30 | 0.40 | 26    | 0.70    | 1.00  |
| <i>Sebastes oblongus</i>         | Oblong rockfish                           | Scorpaeniformes | Scorpaenidae   | 21.30   | 0.70 |      |       |         |       |
| <i>Sebastes pachycephalus</i>    | Spotbelly rockfish                        | Salmoniformes   | Salmonidae     | 19.10   | 0.80 |      |       |         |       |
| <i>Sebastes schlegelii</i>       | Korean rockfish                           | Scorpaeniformes | Scorpaenidae   | 21.40   | 0.50 |      |       |         |       |
| <i>Sebastes tazcanowskii</i>     | White-edged rockfish                      | Perciformes     | Sciaenidae     | 19.70   | 1.70 |      |       |         |       |
| <i>Sebastes thompsoni</i>        | Gold eye rockfish                         | Scorpaeniformes | Scorpaenidae   | 18.60   | 1.50 |      |       |         |       |
| <i>Sebastes vulpes</i>           | Fox jacopever                             | Scorpaeniformes | Scorpaenidae   | 22.40   | 1.00 |      |       |         |       |
| <i>Sebastes marmoratus</i>       | Scorpion fish                             | Scorpaeniformes | Scorpaenidae   | 19.60   | 0.45 | 0.50 | 3     | 1.20    | 2.00  |
| <i>Sebastolobus macrochir</i>    | Kichiji Rockfish/ Broadbanded Thorny head | Scorpaeniformes | Sebastidae     | 13.60   | 0.30 | 0.40 | 65    | 1.00    | 4.00  |
| <i>Semicossyphus reticulatus</i> | Cold porgy                                | Perciformes     | Labridae       | 18.50   | 0.30 |      |       |         |       |
| <i>Seriola dumerili</i>          | Greater Amberjack                         | Perciformes     | Carangidae     | 21.00   | 0.60 | 0.70 | 4     | 5.30    | 4.00  |
| <i>Seriola lalandi</i>           | Amberjack                                 | Perciformes     | Carangidae     | 22.45   | 0.85 | 0.70 | 19    | 2.10    | 5.00  |
| <i>Seriola quinqueradiata</i>    | Yellow tail                               | Perciformes     | Carangidae     | 21.20   | 1.00 | 0.70 | 50    | 3.80    | 8.00  |
| <i>Seriola punctata</i>          | Silver Warehou                            | Perciformes     | Centrolophidae | 18.60   | 0.60 | 0.50 | 100   | 1.80    | 3.00  |
| <i>Setipinna phasa</i>           | Gangetic Hairfin Anchovy                  | Clupeiformes    | Engraulidae    | 17.70   | 1.80 | 3.20 | 12    |         |       |
| <i>Setipinna taty</i>            | Scaly Hairfin Anchovy                     | Clupeiformes    | Engraulidae    | 19.30   | 2.30 | 1.60 | 8     |         |       |
| <i>Siganus fuscescens</i>        | Mottled spinefoot                         | Perciformes     | Siganidae      | 20.30   | 1.20 |      |       |         |       |
| <i>Sillago japonica</i>          | Japanese Whiting                          | Perciformes     | Sillaginidae   | 18.50   | 0.10 | 0.40 | 1     | 2.20    | 0.70  |
| <i>Sillago sihama</i>            | Silver sillago                            | Perciformes     | Sillaginidae   | 19.50   | 2.30 |      |       |         |       |
| <i>Silurus asotus</i>            | Amur catfish                              | Siluriformes    | Siluridae      | 15.10   | 0.80 |      |       |         |       |
| <i>Siniperca scherzeri</i>       | Leopard mandarin fish                     | Perciformes     | Percichthyidae | 17.20   | 2.10 |      |       |         |       |
| <i>Sperata seenghala</i>         | Giant River-Catfish                       | Siluriformes    | Bagridae       | 15.90   | 0.70 | 0.23 |       |         |       |
| <i>Sphyaena japonica</i>         | Japanese barracuda                        | Perciformes     | Sphyaenidae    | 18.90   | 0.30 |      |       |         |       |
| <i>Sphyaena pinguis</i>          | Red barracuda                             | Perciformes     | Sphyaenidae    | 19.70   | 0.60 | 0.50 | 12    | 2.30    | 11.00 |
| <i>Spratelloides gracilis</i>    | Blue Sprat                                | Clupeiformes    | Clupeidae      | 18.80   | 1.10 | 1.90 |       | 8.30    | 10.00 |
| <i>Sprattus fuegensis</i>        | Falkland Sprat                            | Clupeiformes    | Clupeidae      | 14.00   |      |      |       |         |       |

| Species                         | Common name             | Order             | Family          | Protein | Iron | Zinc | Vit A | Vit B12 | Vit D |
|---------------------------------|-------------------------|-------------------|-----------------|---------|------|------|-------|---------|-------|
| <i>Sprattus sprattus</i>        | Sprat                   | Clupeiformes      | Clupeidae       | 22.63   |      |      |       |         |       |
| <i>Stenodus leucichthys</i>     | Sheefish                | Salmoniformes     | Salmonidae      | 19.00   | 0.40 | 0.30 |       |         |       |
| <i>Stephanolepis cirrhifer</i>  | Thread-sail filefish    | Tetraodontiformes | Mocanthidae     | 18.95   | 0.30 | 0.40 | 2     | 1.30    | 43.00 |
| <i>Stichaeus grigorjewi</i>     | Long shanny             | Perciformes       | Stichaeidae     | 19.10   | 1.20 |      |       |         |       |
| <i>Strangomera bentincki</i>    | Araucanian herring      | Clupeiformes      | Clupeidae       | 16.50   |      |      |       |         |       |
| <i>Suggrundus meerdervoorti</i> | Big-eyed flathead       | Scorpaeniformes   | Platycephalidae | 17.50   | 0.20 | 0.60 | 2     | 3.00    | 11.00 |
| <i>Synchiropus altivelis</i>    | Highfin bigeye dragonet | Perciformes       | Callionymidae   | 16.90   | 0.60 |      |       |         |       |
| <i>Synodus myops</i>            | Snakefish               | Aulopiformes      | Synodontidae    | 20.00   | 0.60 |      |       |         |       |
| <i>Systemus sarana</i>          | Olive Barb              | Cypriniformes     | Cyprinidae      | 17.40   | 0.60 | 0.74 |       |         |       |
| <i>Tachysurus fulvidraco</i>    | Yellow catfish          | Siluriformes      | Bagridae        | 15.55   | 0.90 |      |       |         |       |
| <i>Takifugu pardalis</i>        | Panther puffer          | Tetraodontiformes | Tetraodontidae  | 18.90   | 2.50 |      |       |         |       |
| <i>Takifugu poecilonotus</i>    | Fine-patterned puffer   | Tetraodontiformes | Tetraodontidae  | 15.90   | 1.00 |      |       |         |       |
| <i>Takifugu porphyreus</i>      | Purple puffer           | Tetraodontiformes | Tetraodontidae  | 20.20   | 0.25 | 1.50 | 7     | 3.00    | 6.00  |
| <i>Takifugu rubripes</i>        | Tiger puffer            | Tetraodontiformes | Tetraodontidae  | 19.05   | 0.25 | 0.90 | 3     | 1.90    | 4.00  |
| <i>Takifugu stictonotus</i>     | Spotty-back puffer      | Tetraodontiformes | Tetraodontidae  | 19.30   | 3.10 |      |       |         |       |
| <i>Takifugu vermicularis</i>    | Purple puffer           | Tetraodontiformes | Tetraodontidae  | 20.25   | 1.20 |      |       |         |       |
| <i>Takifugu xanthopterus</i>    | Yellowfin puffer        | Tetraodontiformes | Tetraodontidae  | 19.30   | 4.40 |      |       |         |       |
| <i>Tanakius kitaharae</i>       | Willow flounder         | Perciformes       | Carangidae      | 18.30   | 1.90 |      |       |         |       |
| <i>Tenualosa ilisha</i>         | Hilsha Shad             | Clupeiformes      | Clupeidae       | 18.00   | 1.30 | 0.54 |       |         |       |
| <i>Thamnaconus modestus</i>     | Black scraper           | Tetraodontiformes | Mocanthidae     | 18.05   | 0.45 | 0.50 |       | 1.40    | 8.00  |
| <i>Theragra chalcogramma</i>    | Alaska pollack          | Gadiformes        | Gadidae         | 17.45   | 0.85 | 0.50 | 10    | 2.90    | 0.50  |
| <i>Thunnus alalunga</i>         | Albacore                | Perciformes       | Scombridae      | 26.00   | 0.90 | 0.50 | 4     | 2.80    | 7.00  |
| <i>Thunnus albacares</i>        | Yellowfin tuna          | Perciformes       | Scombridae      | 24.10   | 1.80 | 0.50 | 2     | 5.80    | 6.00  |
| <i>Thunnus maccoyii</i>         | Southern Bluefin Tuna   | Perciformes       | Scombridae      | 23.30   | 1.60 | 0.50 | 39    | 0.70    |       |
| <i>Thunnus obesus</i>           | Big-Eye Tuna            | Perciformes       | Scombridae      | 22.80   | 1.40 | 0.40 | 3     | 4.50    | 2.00  |
| <i>Thunnus thynnus</i>          | Bluefin tuna            | Perciformes       | Scombridae      | 26.20   | 2.05 | 0.50 | 61    | 6.90    | 12.00 |
| <i>Thymallus arcticus</i>       | Arctic Grayling         | Salmoniformes     | Salmonidae      | 20.00   | 1.00 | 0.70 |       |         |       |
| <i>Thyrsites atun</i>           | Barracouta              | Perciformes       | Gempylidae      | 21.70   | 0.60 | 0.50 | 55    | 6.50    | 2.00  |
| <i>Trachipterus ishikawae</i>   | Slender ribbonfish      | Lampriformes      | Trachipteridae  | 18.10   | 0.30 |      |       |         |       |
| <i>Trachurus japonicus</i>      | Horse mackerel          | Perciformes       | Carangidae      | 20.20   | 0.75 | 1.10 | 7     | 7.10    | 8.90  |
| <i>Trachurus picturatus</i>     | Bluejack Mackerel       | Perciformes       | Carangidae      | 19.00   |      |      |       |         |       |
| <i>Trachurus trachurus</i>      | Atlantic Horse Mackerel | Perciformes       | Carangidae      | 19.60   | 1.00 | 0.90 | 16    | 8.10    | 8.00  |
| <i>Tribolodon hakonensis</i>    | Far eastern dace        | Cypriniformes     | Cyprinidae      | 19.20   | 1.10 | 3.40 | 41    | 8.50    | 19.00 |
| <i>Trichiurus lepturus</i>      | Hair tail               | Perciformes       | Trichiuridae    | 17.50   | 0.60 | 0.50 | 52    | 0.90    | 14.00 |
| <i>Trichogaster fasciata</i>    | Banded Gourami          | Perciformes       | Belontiidae     | 15.80   | 0.90 | 1.35 | 39    |         |       |
| <i>Umbrina canosai</i>          | Argentine Croaker       | Perciformes       | Sciaenidae      | 19.10   |      |      |       |         |       |
| <i>Upeneus japonicus</i>        | Bensasi goatfish        | Perciformes       | Mullidae        | 7.10    | 1.40 |      |       |         |       |
| <i>Uranoscopus japonicus</i>    | Stargazer               | Perciformes       | Uranoscopidae   | 18.20   | 0.70 |      |       |         |       |
| <i>Urophycis brasiliensis</i>   | Brazilian Codling       | Gadiformes        | Phycidae        | 17.60   | 2.10 |      |       |         |       |

| Species                       | Common name            | Order             | Family         | Protein | Iron | Zinc | Vit A | Vit B12 | Vit D |
|-------------------------------|------------------------|-------------------|----------------|---------|------|------|-------|---------|-------|
| <i>Verasper variegatus</i>    | Spotted halibut        | Pleuronectiformes | Pleuronectidae | 18.20   | 0.20 |      |       |         |       |
| <i>Wallago attu</i>           | Wallago                | Siluriformes      | Siluridae      | 15.40   | 0.80 | 0.27 | 1     |         |       |
| <i>Xenentodon cancila</i>     | Freshwater Garfish     | Beloniformes      | Belonidae      | 16.60   | 0.80 | 0.94 | 65    |         |       |
| <i>Xenocephalus elongatus</i> | Blue-spotted stargazer | Perciformes       | Uranoscopidae  | 17.40   | 0.40 |      |       |         |       |
| <i>Xiphias gladius</i>        | Swordfish              | Perciformes       | Xiphiidae      | 18.10   | 3.35 | 0.70 | 61    | 1.90    | 8.80  |
| <i>Zacco platypus</i>         | Common minnow          | Cypriniformes     | Cyprinidae     | 18.85   | 1.25 | 2.50 | 10    | 11.30   | 10.00 |
| <i>Zalanthias kelloggi</i>    | Eastern flower porgy   | Perciformes       | Serranidae     | 19.00   | 1.00 |      |       |         |       |
| <i>Zebrias zebra</i>          | Zebra sole             | Pleuronectiformes | Soleidae       | 18.90   | 1.20 |      |       |         |       |
| <i>Zenopsis nebulosa</i>      | Mirror dory            | Zeiformes         | Zeidae         | 20.30   | 0.80 |      |       |         |       |
| <i>Zeus faber</i>             | John dory              | Zeiformes         | Zeidae         | 19.10   | 0.60 |      |       |         |       |
| <i>Zoarcetes gillii</i>       | Blotched eelpout       | Perciformes       | Zoarcidae      | 18.50   | 0.40 |      |       |         |       |

Supplementary Table 2. Nutrient content of fish species in dataset.<sup>2,3,4,5,6,7,8,9,10,11,12,13,14,15</sup>

| Category                  | Nutrient                                 | # Valid Species | Min  | Max    | Median | Mean | SD    |
|---------------------------|------------------------------------------|-----------------|------|--------|--------|------|-------|
| Protein, fats<br>(g/100g) | Protein                                  | 371             | 6.3  | 33.8   | 18.6   | 18.5 | 2.9   |
|                           | Total fat                                | 367             | 0.1  | 26.8   | 2.3    | 3.6  | 4.1   |
|                           | Omega-3 fatty acids                      | 238             | 0.01 | 7.68   | 0.69   | 0.97 | 1.12  |
|                           | Omega-6 fatty acids                      | 238             | 0.00 | 4.41   | 0.11   | 0.20 | 0.41  |
| Minerals<br>(mg/100g)     | Iron                                     | 344             | 0.10 | 9.10   | 1.00   | 1.19 | 1.04  |
|                           | Zinc                                     | 177             | 0.06 | 3.90   | 0.65   | 0.91 | 0.73  |
| Vitamins<br>(µg/100g)     | Vitamin A (retinol activity equivalents) | 146             | 0.0  | 2680.0 | 15.0   | 96.6 | 356.5 |
|                           | Vitamin B12                              | 124             | 0.0  | 28.2   | 2.9    | 4.6  | 4.4   |
|                           | Vitamin D                                | 122             | 0.0  | 43.0   | 5.0    | 8.1  | 8.2   |

Supplementary Table 3. Summary statistics for life history traits.

| Continuous Variables           | # Valid Species | Min   | Max   | Median | Mean   | SD     |
|--------------------------------|-----------------|-------|-------|--------|--------|--------|
| <b>Minimum depth (m)</b>       | 259             | 0     | 320   | 3.0    | 28.15  | 59.4   |
| <b>Maximum depth (m)</b>       | 249             | 2     | 3850  | 200.0  | 247.5  | 484.8  |
| <b>Maximum length (cm)</b>     | 370             | 8.0   | 505.1 | 48.0   | 71.7   | 70.4   |
| <b><i>a</i> (L/W scalar)</b>   | 333             | .0004 | .0263 | 0.0089 | 0.0097 | 0.0055 |
| <b><i>b</i> (L/W exponent)</b> | 332             | 2.79  | 3.39  | 3.05   | 3.05   | 0.08   |
| <b>Trophic level</b>           | 373             | 2.0   | 4.7   | 3.6    | 3.6    | 0.5    |

| Categorical Variables    | Categories      | # Species | Percent |
|--------------------------|-----------------|-----------|---------|
| <b>Habitat</b>           | Bathydemersal   | 15        | 4.0     |
|                          | Benthopelagic   | 90        | 23.9    |
|                          | Demersal        | 149       | 39.6    |
|                          | Pelagic         | 25        | 6.6     |
|                          | Pelagic-neritic | 51        | 13.6    |
|                          | Reef-associated | 44        | 11.7    |
| <b>Latitudinal range</b> | Tropical        | 126       | 33.5    |
|                          | Subtropical     | 104       | 27.7    |
|                          | Temperate       | 126       | 33.5    |
|                          | Boreal/austral  | 5         | 1.3     |
|                          | Polar           | 8         | 2.1     |

Supplementary Table 4. Evolutionary correlation matrix, with omega-3 and omega-6 fatty acids included. Correlations with  $p < 0.1$  are in **bold**.

|         | depmin | depmax       | maxlen       | a_lw         | b_lw         | troph       | protein      | fat          | iron        | zinc         | vitA         | vitb12       | vitd        |
|---------|--------|--------------|--------------|--------------|--------------|-------------|--------------|--------------|-------------|--------------|--------------|--------------|-------------|
| depmin  | 1.00   | <b>0.22</b>  | 0.07         | -0.06        | 0.05         | 0.09        | -0.02        | 0.06         | -0.04       | -0.08        | 0.17         | 0.00         | -0.11       |
| depmax  | 0.22   | 1.00         | <b>0.46</b>  | <b>-0.32</b> | 0.15         | <b>0.43</b> | -0.23        | <b>0.37</b>  | -0.07       | -0.25        | <b>0.46</b>  | -0.09        | 0.04        |
| maxlen  | 0.07   | <b>0.46</b>  | 1.00         | -0.13        | -0.10        | <b>0.44</b> | 0.11         | 0.12         | -0.06       | <b>-0.45</b> | <b>0.31</b>  | <b>-0.21</b> | 0.13        |
| a_lw    | -0.06  | <b>-0.32</b> | -0.13        | 1.00         | <b>-0.60</b> | -0.22       | 0.13         | -0.18        | -0.13       | -0.11        | -0.13        | -0.15        | 0.09        |
| b_lw    | 0.05   | 0.15         | -0.10        | <b>-0.60</b> | 1.00         | 0.00        | -0.15        | 0.10         | 0.20        | 0.23         | 0.15         | 0.06         | 0.04        |
| troph   | 0.09   | <b>0.43</b>  | <b>0.44</b>  | -0.22        | 0.00         | 1.00        | 0.17         | 0.01         | -0.13       | -0.24        | 0.06         | -0.16        | -0.06       |
| protein | -0.02  | -0.23        | 0.11         | 0.13         | -0.15        | 0.17        | 1.00         | <b>-0.39</b> | 0.08        | 0.07         | <b>-0.41</b> | 0.14         | 0.01        |
| lipid   | 0.06   | <b>0.37</b>  | 0.12         | -0.18        | 0.10         | 0.01        | <b>-0.39</b> | 1.00         | 0.16        | -0.04        | <b>0.69</b>  | <b>0.31</b>  | <b>0.42</b> |
| iron    | -0.04  | -0.07        | -0.06        | -0.13        | 0.20         | -0.13       | 0.08         | 0.16         | 1.00        | <b>0.55</b>  | 0.21         | <b>0.56</b>  | <b>0.26</b> |
| zinc    | -0.08  | -0.25        | <b>-0.45</b> | -0.11        | 0.23         | -0.24       | 0.07         | -0.04        | <b>0.55</b> | 1.00         | -0.03        | <b>0.38</b>  | 0.18        |
| ret_eq  | 0.17   | <b>0.46</b>  | <b>0.31</b>  | -0.13        | 0.15         | 0.06        | <b>-0.41</b> | <b>0.69</b>  | 0.21        | -0.03        | 1.00         | 0.05         | <b>0.27</b> |
| vitb12  | 0.00   | -0.09        | -0.21        | -0.15        | 0.06         | -0.16       | 0.14         | <b>0.31</b>  | <b>0.56</b> | <b>0.38</b>  | 0.05         | 1.00         | <b>0.22</b> |
| vitd    | -0.11  | 0.04         | 0.13         | 0.09         | 0.04         | -0.06       | 0.01         | <b>0.42</b>  | <b>0.26</b> | 0.18         | <b>0.27</b>  | 0.22         | 1.00        |

P-VALUES

|         | depmin | depmax       | maxlen       | a_lw         | b_lw         | troph        | protein      | fat          | iron         | zinc         | vitA         | vitb12       | vitd         |
|---------|--------|--------------|--------------|--------------|--------------|--------------|--------------|--------------|--------------|--------------|--------------|--------------|--------------|
| depmin  | NA     | 0.085        | 0.340        | 0.351        | 0.372        | 0.301        | 0.392        | 0.351        | 0.376        | 0.322        | 0.157        | 0.397        | 0.271        |
| depmax  | 0.085  | NA           | <b>0.000</b> | <b>0.014</b> | 0.186        | <b>0.001</b> | 0.071        | <b>0.004</b> | 0.337        | 0.050        | <b>0.000</b> | 0.308        | 0.381        |
| maxlen  | 0.340  | <b>0.000</b> | NA           | 0.232        | 0.281        | <b>0.000</b> | 0.269        | 0.258        | 0.355        | <b>0.000</b> | <b>0.016</b> | <b>0.097</b> | 0.223        |
| a_lw    | 0.351  | <b>0.014</b> | 0.232        | NA           | <b>0.000</b> | 0.087        | 0.234        | 0.135        | 0.228        | 0.267        | 0.226        | 0.188        | 0.308        |
| b_lw    | 0.372  | 0.186        | 0.281        | <b>0.000</b> | NA           | 0.397        | 0.198        | 0.283        | 0.112        | 0.068        | 0.199        | 0.351        | 0.379        |
| troph   | 0.301  | <b>0.001</b> | <b>0.000</b> | 0.087        | 0.397        | NA           | 0.150        | 0.396        | 0.240        | 0.064        | 0.354        | 0.175        | 0.359        |
| protein | 0.392  | 0.071        | 0.269        | 0.234        | 0.198        | 0.150        | NA           | <b>0.002</b> | 0.317        | 0.333        | <b>0.001</b> | 0.207        | 0.395        |
| lipid   | 0.351  | <b>0.004</b> | 0.258        | 0.135        | 0.283        | 0.396        | <b>0.002</b> | NA           | 0.170        | 0.374        | <b>0.000</b> | <b>0.017</b> | <b>0.001</b> |
| iron    | 0.376  | 0.337        | 0.355        | 0.228        | 0.112        | 0.240        | 0.317        | 0.170        | NA           | <b>0.000</b> | 0.097        | <b>0.000</b> | <b>0.041</b> |
| zinc    | 0.322  | 0.050        | <b>0.000</b> | 0.267        | 0.068        | 0.064        | 0.333        | 0.374        | <b>0.000</b> | NA           | 0.385        | <b>0.003</b> | 0.134        |
| ret_eq  | 0.157  | <b>0.000</b> | <b>0.016</b> | 0.226        | 0.199        | 0.354        | <b>0.001</b> | <b>0.000</b> | 0.097        | 0.385        | NA           | 0.362        | <b>0.034</b> |
| vitb12  | 0.397  | 0.308        | 0.097        | 0.188        | 0.351        | 0.175        | 0.207        | <b>0.017</b> | <b>0.000</b> | <b>0.003</b> | 0.362        | NA           | 0.082        |
| vitd    | 0.271  | 0.381        | 0.223        | 0.308        | 0.379        | 0.359        | 0.395        | <b>0.001</b> | <b>0.041</b> | 0.134        | <b>0.034</b> | 0.082        | NA           |

# Supplementary Figures

Supplementary Figure 1. Residual plots for nutrient prediction: protein (A), total fat (B), iron (C), zinc (D), vitamin A (E), vitamin B12 (F), and vitamin D (G).

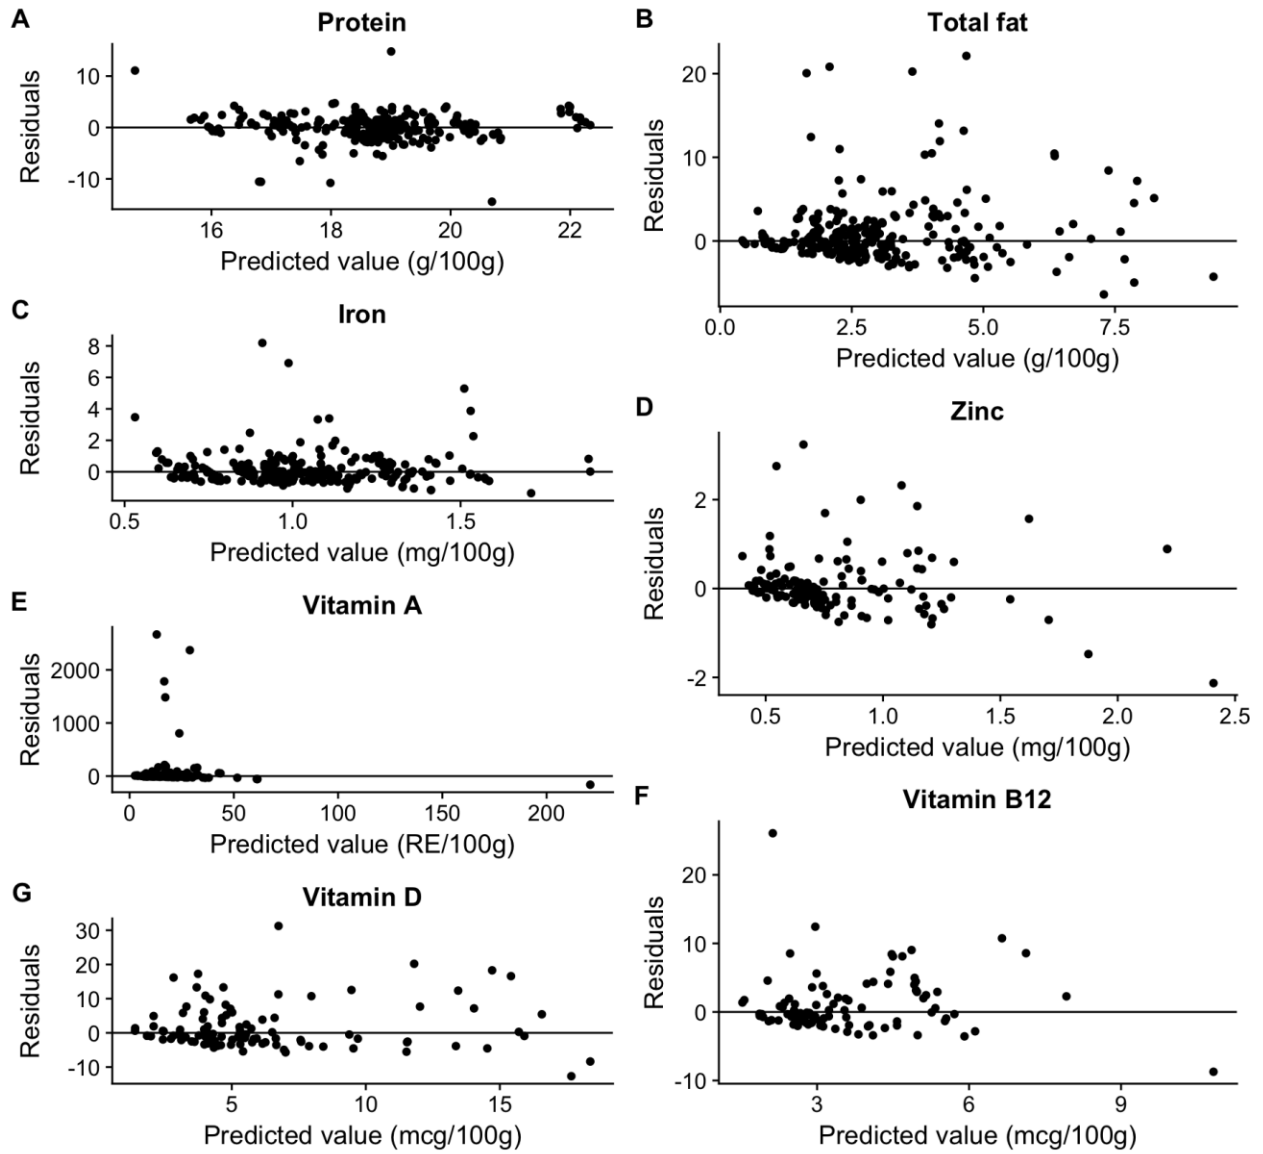

---

## Supplementary References

- <sup>1</sup> Food and Agricultural Organization (FAO) of the United Nations. Codex Alimentarius: Food Labeling Complete Texts. FAO/WHO (2001).
- <sup>2</sup> Universidad Nacional de Luján. *Tabla de composicion de alimentos*. 2010. Accessed 25 July 2017 from: <http://www.unlu.edu.ar/~argenfood/Tablas/Tabla.htm>.
- <sup>3</sup> Shaheen, N. et al. *Food Composition Tables for Bangladesh*. University of Dhaka (2013).
- <sup>4</sup> Seyha, S. & Kuong, K. *Food composition table for Cambodia*. Ministry of Agriculture, Forestry and Fisheries of Cambodia (2013).
- <sup>5</sup> Centre for Indigenous Peoples' Nutrition and Environment (McGill University). *Traditional Food Composition Nutribase*. 2005. Accessed 25 July 2017 from: [https://www.mcgill.ca/cine/files/cine/Traditional\\_Food\\_Composition\\_Nutribase.pdf](https://www.mcgill.ca/cine/files/cine/Traditional_Food_Composition_Nutribase.pdf)
- <sup>6</sup> Rittenschober, D., Stadlmayr, B., Nowak, V., Du, J. and Charrondiere, U.R. Report on the development of the FAO/INFOODS user database for fish and shellfish (uFiSh) - Challenges and possible solutions. *Food Chemistry* **193**, 112–120 (2016).
- <sup>7</sup> Prynne, C.J. & Paul, A.A. *Food Composition Table for use in The Gambia*. MRC Human Nutrition Research, Cambridge, UK (2011).
- <sup>8</sup> Office for Resources, Policy Division Science and Technology Policy Bureau, Japan. *Standard Tables of Food Composition in Japan, Seventh Revised Edition*. 2015. Accessed 25 July 2017 from: [http://www.mext.go.jp/en/policy/science\\_technology/policy/title01/detail01/1374030.htm](http://www.mext.go.jp/en/policy/science_technology/policy/title01/detail01/1374030.htm)



- 
- <sup>9</sup> Kim, J.C., Cho, Y.S., Kim, S.N., Choi, Y., Kim, J.B., Park, H.J., & Kim, H.R. *8th revision Standard Food Composition Table*. Department of Agrofood Resources, NAAS, RDA, Korea (2013).
- <sup>10</sup> Korkalo, L., Hauta-Alus, H. and Mutanen, M. *Food composition tables for Mozambique, Version 2*. Department of Food and Environmental Sciences. University of Helsinki, Finland (2011).
- <sup>11</sup> Sivakumaran, S., Martell, S. and Huffman, L. *The Concise New Zealand Food Composition Tables, 9th Edition*. The New Zealand Institute for Plant & Food Research Limited and Ministry of Health (2012).
- <sup>12</sup> US Department of Agriculture (USDA), Agricultural Research Service, Nutrient Data Laboratory. *USDA National Nutrient Database for Standard Reference, Release 28 (Slightly revised)*. Accessed 25 July 2017 from: <http://www.ars.usda.gov/ba/bhnrc/ndl> (2016).
- <sup>13</sup> Stadlmayr, B. et al. *Table de composition des aliments d'Afrique de l'Ouest*. Food and Agriculture Organization of the United Nations. Accessed 25 July 2017 from: <http://www.fao.org/docrep/015/i2698b/i2698b00.pdf> (2012).
- <sup>14</sup> Dignan, C., Burlingame, B., Kumar, S., and Aalbersberg, W. *The Pacific Islands food composition tables, Second edition*. Food and Agriculture Organization of the United Nations. Accessed 25 July 2017 from: <http://www.fao.org/docrep/007/y5432e/y5432e00.htm> (2004).
- <sup>15</sup> Rittenschober D., Nowak, V., and Charrondiere, U.R. Review of availability of food composition data for fish and shellfish. *Food Chemistry* **141**, 4304-4310 (2013).
