# Supplementary material for: Predicting nutrient content of ray-finned fishes using phylogenetic information
Source: PubMed Central journal article supplement (PMC6156416; doi:10.1038/s41467-018-06199-w), 2018-09-25
Supplement: 41467_2018_6199_MOESM3_ESM.pdf [file 41467_2018_6199_MOESM3_ESM.pdf]

## Description of Additional Supplementary Files:

- **Supplementary data file 1.** *SD1\_fish\_database.csv*. Database of life history and nutrient content values for all included species.
- **Supplementary data file 2.** *SD2\_phyloPred\_lambda.totalfat.csv*. Predicted total fat content for Actinopterygii species.
- **Supplementary data file 3.** *SD3\_phyloPred\_lambda.omega3.csv*. Predicted omega-3 fatty acids content for Actinopterygii species.
- **Supplementary data file 4.** *SD4\_phyloPred\_lambda.omega6.csv*. Predicted omega-6 fatty acids content for Actinopterygii species.
- **Supplementary data file 5.** *SD5\_phyloPred\_lambda.iron.csv*. Predicted iron content for Actinopterygii species.
- **Supplementary data file 6.** *SD6\_phyloPred\_lambda.zinc.csv*. Predicted zinc content for Actinopterygii species.
- **Supplementary data file 7.** *SD7\_phyloPred\_lambda.vitA.csv*. Predicted vitamin A content for Actinopterygii species.
- **Supplementary data file 8.** *SD8\_phyloPred\_lambda.vitB12.csv*. Predicted vitamin B12 content for Actinopterygii species.
- **Supplementary data file 9.** *SD9\_phyloPred\_lambda.vitD.csv*. Predicted vitamin D content for Actinopterygii species.
- **Supplementary data file 10.** *SD1\_phyloPred\_lambda.protein.csv*. Predicted protein content for Actinopterygii species.
- **Supplementary data file 11.** *SD11\_bionut.evolCorMat.R*. Script for evolutionary correlations.
- **Supplementary data file 12.** *SD12\_bionut.PGLS.R*. Script for phylogenetic least squares regression.
- **Supplementary data file 13.** *SD13\_phylosigByVar.R*. Script for estimating phylogenetic signal of nutrient variables.
- **Supplementary data file 14.** *SD14\_predValidation.lambda-only.R*. Script for carrying out validation for predictions under the lambda model.
- **Supplementary data file 15.** *SD15\_predValidation.pgls-lambda.R*. Script for carrying out validation for predictions under the lambda plus phylogenetic regression model.
